# Supplementary material for: A secreted proteomic footprint for stem cell pluripotency
Source: PubMed Central journal article supplement (PMC11178176; doi:10.1371/journal.pone.0299365), 2024-06-14

Fig. 6 A)

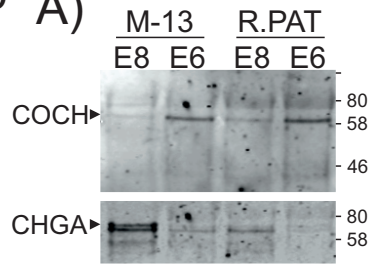

**CHGA**

**COCH**

| M-13 |    | R.PAT |    |
|------|----|-------|----|
| E8   | E6 | E8    | E6 |

| M-13 |    | R.PAT |    |
|------|----|-------|----|
| E8   | E6 | E8    | E6 |

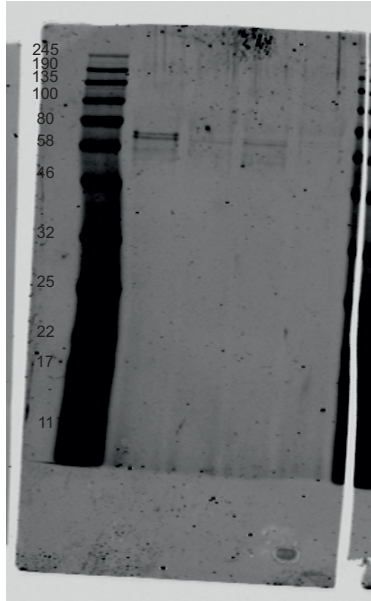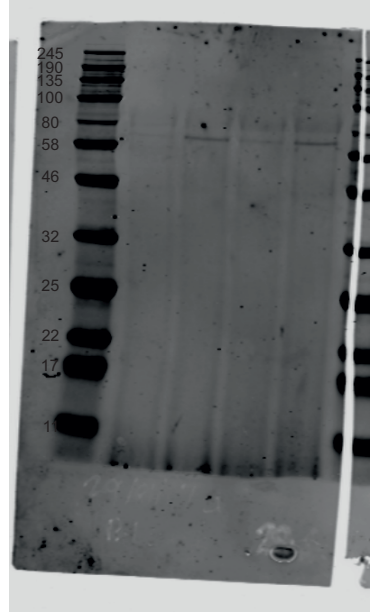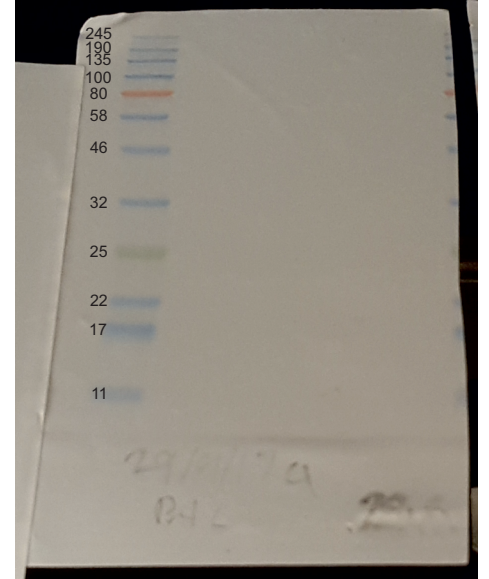

6.B)

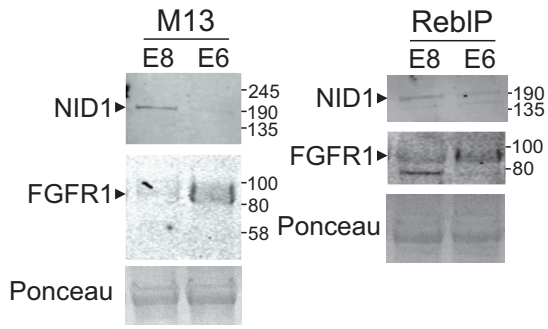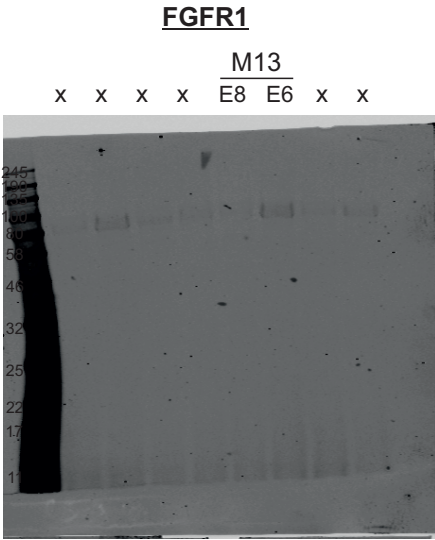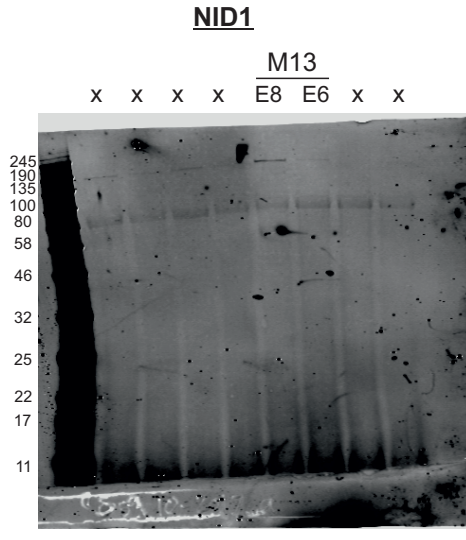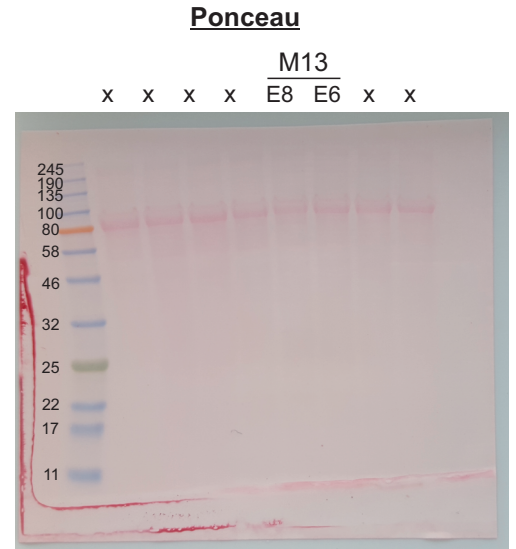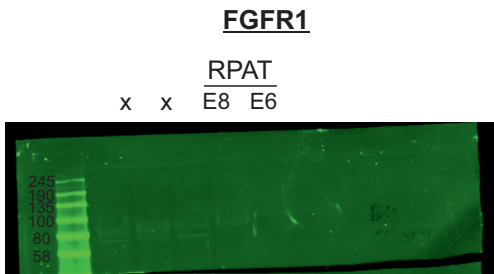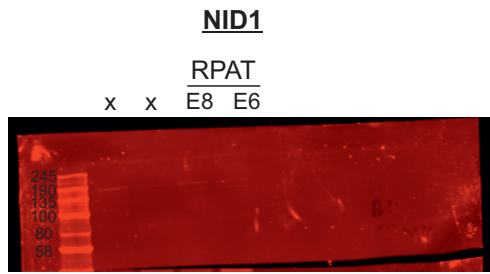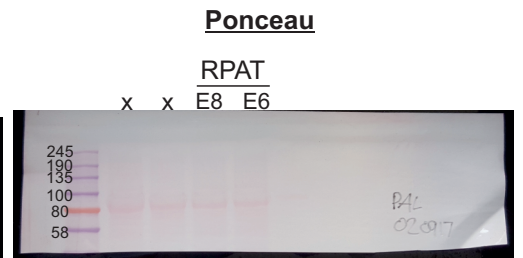

6.C) M-13 R.PAT  
E8 E6 E8 E6

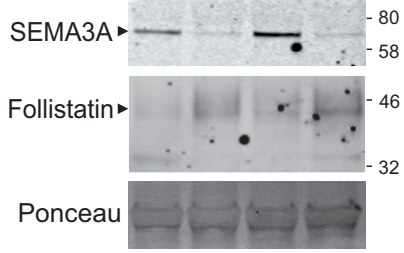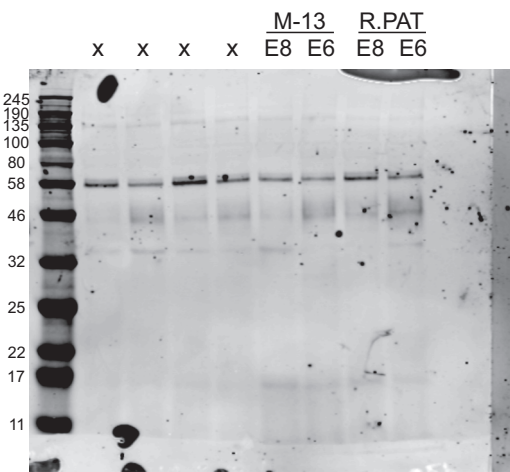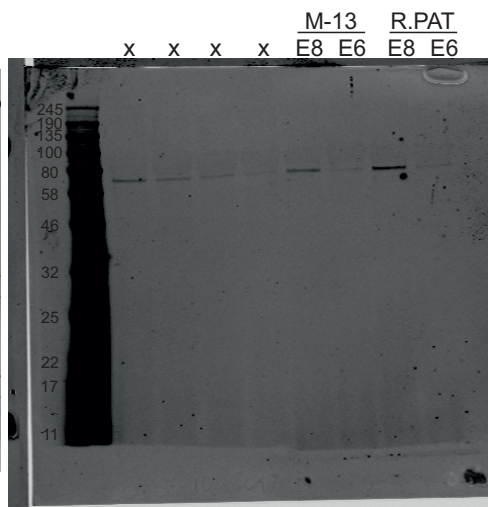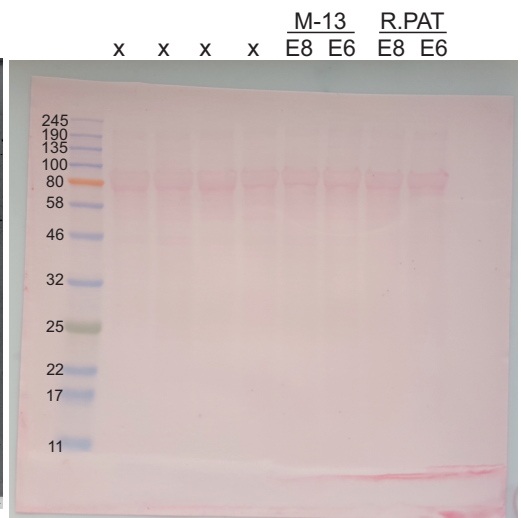

6.D)

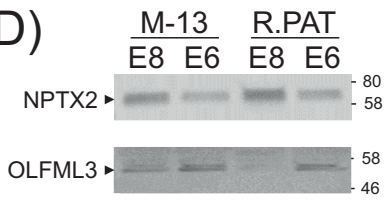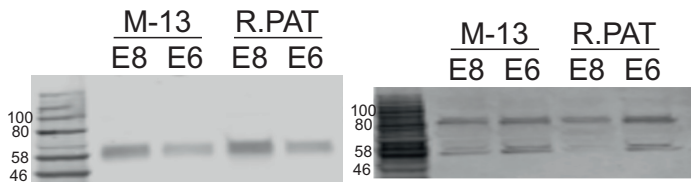

Fig. 7

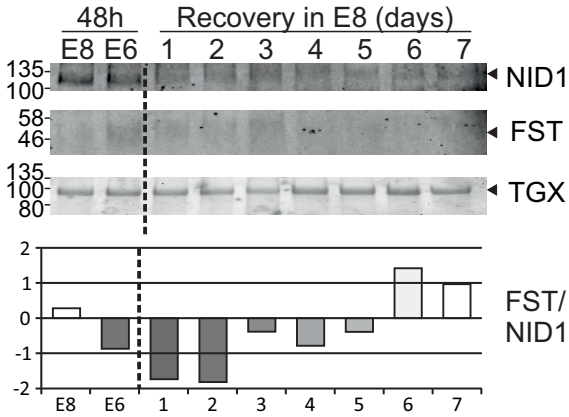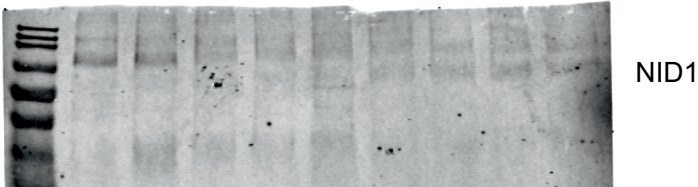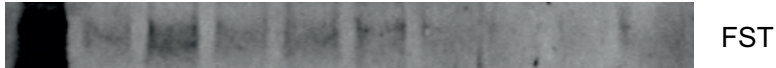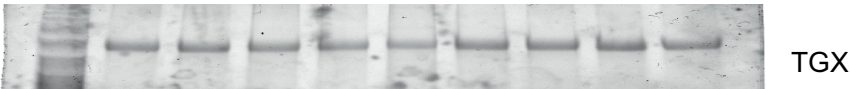

Fig. S4

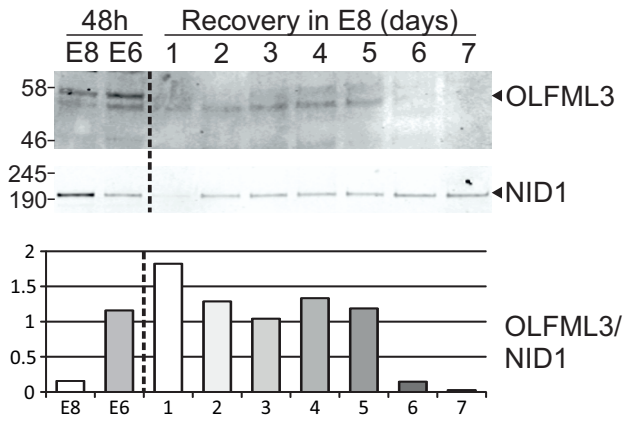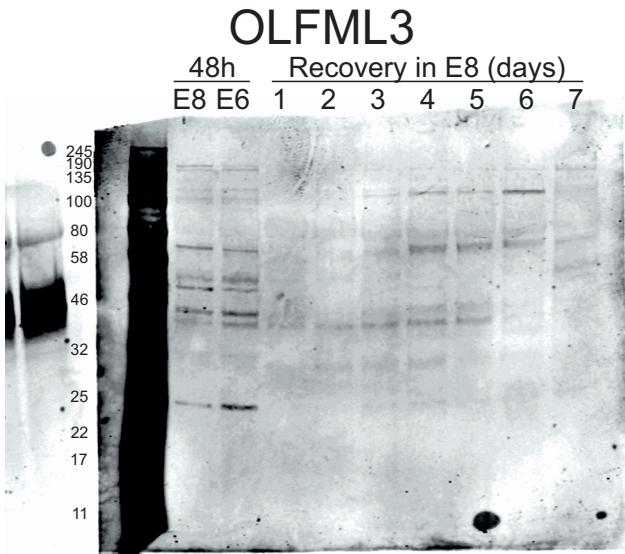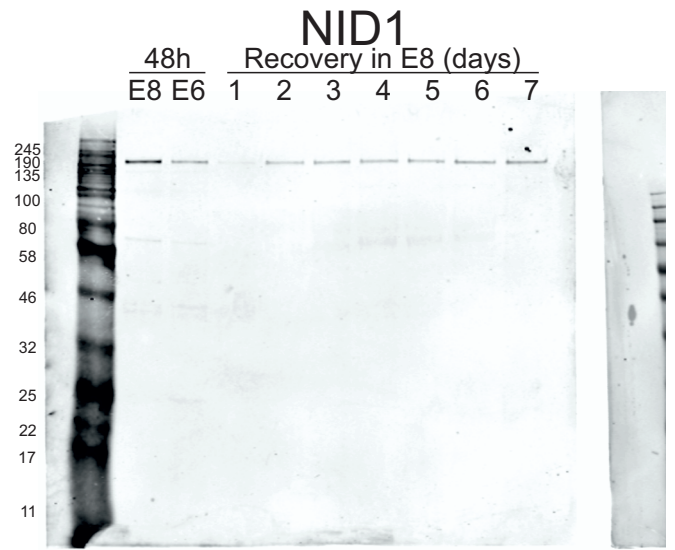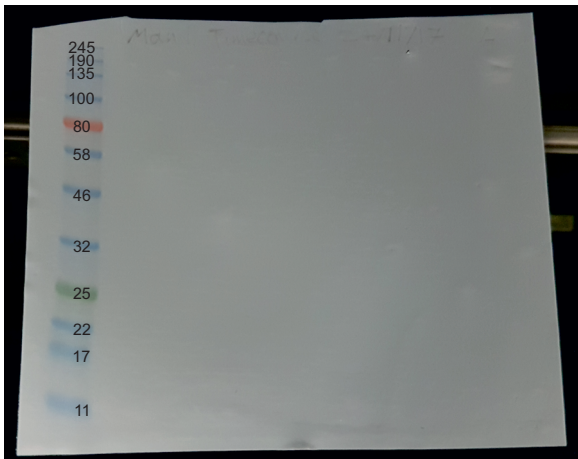

Supplement: pone.0299365.s007.pdf [file pone.0299365.s007.pdf]
